# Supplementary material
Source: MDPI journal article supplement (https://www.mdpi.com/search?q=biology-09-00136)
Supplement: s001 [file biology-09-00136-s001.pdf]

# Termite Societies Promote the Taxonomic and Functional Diversity of Archaeal Communities in Mound Soils

Monde Wakung'oli, Adenike Eunice Amoo, Ben Jesuorsemwon Enagbonma, and Olubukola Oluranti Babalola\*

## Supplementary

**Table S1:** Soil properties in termite mound soils and surrounding soils

| Site | T1   | T1   | T1   | T1   | T2   | T2   | T2   | T2   | S1   | S1  | S1   | S1   | S2   | S2   | S2   | S2   |
|------|------|------|------|------|------|------|------|------|------|-----|------|------|------|------|------|------|
| Sand | 71   | 70   | 66   | 53   | 65   | 25   | 30   | 71   | 80   | 46  | 80   | 82   | 75   | 79   | 73   | 79   |
| Silt | 8    | 9    | 6    | 13   | 12   | 29   | 30   | 8    | 6    | 31  | 6    | 4    | 9    | 10   | 11   | 11   |
| Clay | 21   | 21   | 28   | 34   | 23   | 49   | 40   | 21   | 14   | 23  | 14   | 14   | 16   | 11   | 16   | 10   |
| K    | 507  | 304  | 276  | 487  | 403  | 459  | 489  | 359  | 186  | 285 | 217  | 179  | 208  | 209  | 160  | 161  |
| Ca   | 1500 | 1278 | 2215 | 2525 | 1790 | 2237 | 2417 | 2507 | 2010 | 997 | 1046 | 1921 | 873  | 1211 | 1140 | 1210 |
| Mg   | 253  | 503  | 672  | 872  | 632  | 535  | 647  | 675  | 343  | 560 | 324  | 172  | 414  | 427  | 128  | 352  |
| pH   | 4.89 | 4.79 | 5.52 | 5.21 | 4.21 | 4.52 | 5.11 | 4.06 | 5.64 | 5.4 | 5.97 | 6.14 | 5.84 | 5.57 | 5.09 | 5.03 |
| N    | 0.13 | 0.07 | 0.07 | 0.1  | 0.14 | 0.09 | 0.1  | 0.07 | 1    | 0.1 | 0.26 | 1    | 0.29 | 0.22 | 0.22 | 0.27 |
| P    | 1    | 0    | 0    | 0    | 1    | 0    | 1    | 1    | 0    | 0   | 0    | 0    | 0    | 0    | 0    | 0    |
| OC   | 0.1  | 0.1  | 0.1  | 0.94 | 0.1  | 0.1  | 0.1  | 0.1  | 0.1  | 0.1 | 0.12 | 0.11 | 0.1  | 0.11 | 0.1  | 0.11 |

**Table S2:** Abundance of the archaeal communities at the phylum level

| Phylum               | T1   | T1   | T1   | T1   | T2   | T2   | T2   | T2   | S1   | S1   | S1   | S1   | S2   | S2   | S2   | S2   |
|----------------------|------|------|------|------|------|------|------|------|------|------|------|------|------|------|------|------|
| Crenarchaeota        | 2146 | 2143 | 1553 | 1388 | 563  | 825  | 645  | 636  | 2478 | 1708 | 1324 | 1632 | 1448 | 1492 | 1381 | 2182 |
| Euryarchaeota        | 7140 | 6696 | 6137 | 4463 | 1599 | 3270 | 1576 | 1936 | 5366 | 5820 | 5787 | 5384 | 5284 | 5127 | 3996 | 5679 |
| Korarchaeota         | 99   | 86   | 62   | 41   | 16   | 37   | 31   | 22   | 60   | 43   | 67   | 52   | 47   | 49   | 37   | 63   |
| Nanoarchaeota        | 7    | 5    | 3    | 2    | 2    | 0    | 1    | 0    | 1    | 0    | 3    | 2    | 2    | 1    | 2    | 0    |
| Thaumarchaeota       | 3830 | 4173 | 2874 | 3013 | 1149 | 1269 | 1207 | 1449 | 5602 | 3508 | 1782 | 3004 | 2546 | 3066 | 2575 | 5577 |
| unclassified Archaea | 462  | 392  | 292  | 250  | 78   | 152  | 112  | 108  | 246  | 276  | 305  | 296  | 274  | 280  | 232  | 235  |

**Table S3:** Abundance of the archaeal communities at the family level

| Family                              | T1   | T1   | T1   | T1   | T2  | T2   | T2  | T2  | S1   | S1   | S1   | S1   | S2   | S2   | S2   | S2   |
|-------------------------------------|------|------|------|------|-----|------|-----|-----|------|------|------|------|------|------|------|------|
| Halobacteriaceae                    | 2225 | 2239 | 2074 | 1550 | 488 | 1124 | 486 | 686 | 2004 | 2176 | 2000 | 1863 | 1879 | 1783 | 1465 | 2106 |
| Methanosarcinaceae                  | 825  | 776  | 610  | 622  | 205 | 433  | 212 | 221 | 667  | 704  | 554  | 754  | 685  | 630  | 536  | 635  |
| Nitrosopumilaceae                   | 629  | 722  | 495  | 508  | 176 | 231  | 190 | 274 | 973  | 568  | 313  | 484  | 438  | 525  | 432  | 955  |
| Thermococcaceae                     | 533  | 487  | 472  | 294  | 116 | 223  | 130 | 154 | 309  | 394  | 416  | 338  | 346  | 336  | 257  | 352  |
| unclassified (derived from Archaea) | 462  | 392  | 292  | 250  | 78  | 152  | 112 | 108 | 246  | 276  | 305  | 296  | 274  | 280  | 232  | 235  |
| Cenarchaeaceae                      | 378  | 423  | 296  | 293  | 130 | 160  | 144 | 132 | 458  | 333  | 192  | 252  | 218  | 238  | 246  | 453  |
| Sulfolobaceae                       | 419  | 347  | 300  | 211  | 89  | 142  | 97  | 78  | 340  | 280  | 247  | 206  | 245  | 176  | 221  | 311  |
| Thermoproteaceae                    | 366  | 362  | 280  | 235  | 80  | 165  | 107 | 95  | 270  | 255  | 296  | 242  | 234  | 195  | 215  | 280  |
| Archaeoglobaceae                    | 311  | 222  | 212  | 154  | 60  | 98   | 64  | 56  | 150  | 155  | 189  | 175  | 164  | 168  | 108  | 194  |
| Desulfurococcaceae                  | 248  | 278  | 191  | 173  | 64  | 125  | 52  | 77  | 238  | 204  | 212  | 196  | 196  | 182  | 172  | 199  |

|                       |     |     |     |     |    |     |    |     |     |     |     |     |     |     |     |     |
|-----------------------|-----|-----|-----|-----|----|-----|----|-----|-----|-----|-----|-----|-----|-----|-----|-----|
| Methanobacteriaceae   | 223 | 206 | 187 | 154 | 44 | 87  | 58 | 72  | 165 | 184 | 162 | 169 | 169 | 174 | 100 | 176 |
| Methanomicrobiaceae   | 220 | 201 | 171 | 146 | 52 | 119 | 65 | 105 | 153 | 201 | 159 | 192 | 176 | 168 | 137 | 166 |
| Methanocellaceae      | 237 | 171 | 190 | 124 | 56 | 66  | 30 | 49  | 150 | 169 | 155 | 161 | 178 | 152 | 139 | 144 |
| Methanosaetaceae      | 116 | 119 | 87  | 75  | 56 | 66  | 30 | 49  | 63  | 93  | 110 | 89  | 62  | 56  | 61  | 87  |
| Methanocaldococcaceae | 113 | 107 | 82  | 63  | 17 | 61  | 28 | 31  | 89  | 86  | 80  | 53  | 83  | 81  | 56  | 78  |
| Methanospirillaceae   | 94  | 89  | 86  | 92  | 28 | 34  | 22 | 21  | 91  | 93  | 82  | 99  | 101 | 98  | 82  | 83  |

**Table S4:** Abundance of the archaeal communities at the genus level

| Genus                     | T1  | T1  | T1  | T1  | T2  | T2  | T2  | T2  | S1  | S1  | S1  | S1  | S2  | S2  | S2  | S2  |
|---------------------------|-----|-----|-----|-----|-----|-----|-----|-----|-----|-----|-----|-----|-----|-----|-----|-----|
| Nitrosopumilus            | 629 | 722 | 495 | 508 | 176 | 231 | 190 | 274 | 973 | 568 | 313 | 484 | 438 | 525 | 432 | 955 |
| Methanosarcina            | 622 | 580 | 454 | 490 | 151 | 322 | 158 | 171 | 506 | 554 | 406 | 577 | 514 | 462 | 422 | 489 |
| Candidatus Nitrososphaera | 468 | 575 | 395 | 410 | 199 | 152 | 161 | 169 | 743 | 458 | 249 | 385 | 301 | 396 | 373 | 756 |
| unclassified Archaea      | 462 | 392 | 292 | 250 | 78  | 152 | 112 | 108 | 246 | 276 | 305 | 296 | 274 | 280 | 232 | 235 |
| Cenarchaeum               | 378 | 423 | 296 | 293 | 130 | 160 | 144 | 132 | 458 | 333 | 192 | 252 | 218 | 238 | 246 | 453 |
| Thermococcus              | 304 | 273 | 263 | 180 | 51  | 128 | 74  | 87  | 183 | 232 | 234 | 190 | 200 | 191 | 139 | 218 |
| Sulfolobus                | 306 | 266 | 219 | 159 | 71  | 112 | 82  | 59  | 240 | 212 | 190 | 151 | 184 | 143 | 186 | 238 |
| Haloterrigena             | 235 | 259 | 230 | 189 | 46  | 111 | 49  | 95  | 232 | 262 | 209 | 220 | 239 | 224 | 175 | 220 |
| Methanosphaera            | 22  | 20  | 14  | 16  | 6   | 8   | 1   | 5   | 20  | 32  | 15  | 20  | 23  | 20  | 20  | 18  |
| Haladaptatus              | 198 | 205 | 225 | 137 | 52  | 118 | 30  | 61  | 219 | 221 | 199 | 175 | 184 | 144 | 156 | 207 |
| Halalkalicoccus           | 208 | 216 | 185 | 133 | 57  | 106 | 44  | 51  | 191 | 207 | 171 | 207 | 151 | 161 | 146 | 189 |
| Methanocella              | 237 | 171 | 190 | 124 | 56  | 66  | 30  | 49  | 150 | 169 | 155 | 161 | 178 | 152 | 139 | 144 |
| Haloarcula                | 169 | 141 | 125 | 88  | 38  | 65  | 32  | 49  | 131 | 137 | 147 | 121 | 114 | 77  | 93  | 150 |
| Methanoculleus            | 152 | 133 | 113 | 107 | 31  | 53  | 44  | 37  | 114 | 143 | 103 | 137 | 117 | 122 | 103 | 113 |
| Archaeoglobus             | 161 | 121 | 129 | 92  | 32  | 59  | 32  | 39  | 97  | 100 | 114 | 110 | 117 | 95  | 61  | 120 |
| Haloferax                 | 136 | 131 | 129 | 101 | 38  | 80  | 29  | 40  | 131 | 136 | 115 | 111 | 113 | 105 | 107 | 119 |
| Halogeometricum           | 138 | 137 | 106 | 95  | 22  | 50  | 40  | 40  | 105 | 124 | 108 | 102 | 106 | 80  | 72  | 114 |

**Table S5:** The abundance of the major functional categories in each soil sample

| functional categories      | T1 | T1  | T1 | T1  | T2   | T2   | T2  | T2  | S1 | S1 | S1 | S1 | S2  | S2 | S2  | S2  |
|----------------------------|----|-----|----|-----|------|------|-----|-----|----|----|----|----|-----|----|-----|-----|
| Carbohydrates              | 88 | 111 | 16 | 773 | 1142 | 3118 | 984 | 963 | 82 | 0  | 70 | 0  | 355 | 28 | 255 | 199 |
| Amino Acids and Derivaties | 65 | 113 | 14 | 560 | 981  | 2464 | 739 | 772 | 42 | 0  | 42 | 3  | 237 | 6  | 143 | 149 |
| Nitrogen Metabolism        | 9  | 9   | 0  | 61  | 79   | 239  | 50  | 40  | 4  | 0  | 5  | 0  | 24  | 2  | 5   | 10  |
| Phosphorous Metabolism     | 8  | 8   | 1  | 120 | 175  | 453  | 147 | 147 | 10 | 0  | 7  | 0  | 27  | 0  | 20  | 16  |
| Sulfur Metabolism          | 3  | 3   | 0  | 57  | 66   | 154  | 62  | 39  | 4  | 0  | 4  | 0  | 15  | 2  | 9   | 14  |
| Potassium Metabolism       | 0  | 8   | 1  | 28  | 38   | 89   | 21  | 20  | 0  | 0  | 0  | 0  | 7   | 1  | 2   | 2   |

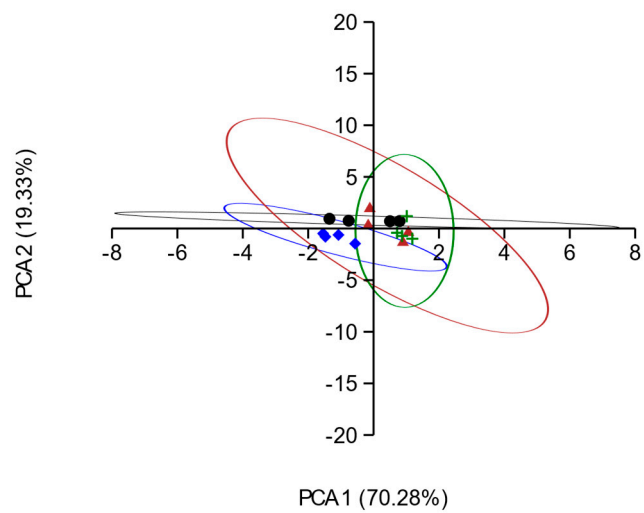

**Figure S1:** Principal component analysis (PCA), showing the archaeal distribution at each site at the genus level.
